# Supplementary material
Source: publisher figshare collection journal article supplement (https://tandf.figshare.com/articles/dataset/_/5572984)

## SUPPLEMENTAL MATERIALS

---

### *Criteria for Grading Quality of Calls*

Examples displayed here were sampled at 48 kHz and spectrograms were produced using an FFT size = 1024 points, Hanning window, and 85% overlap.

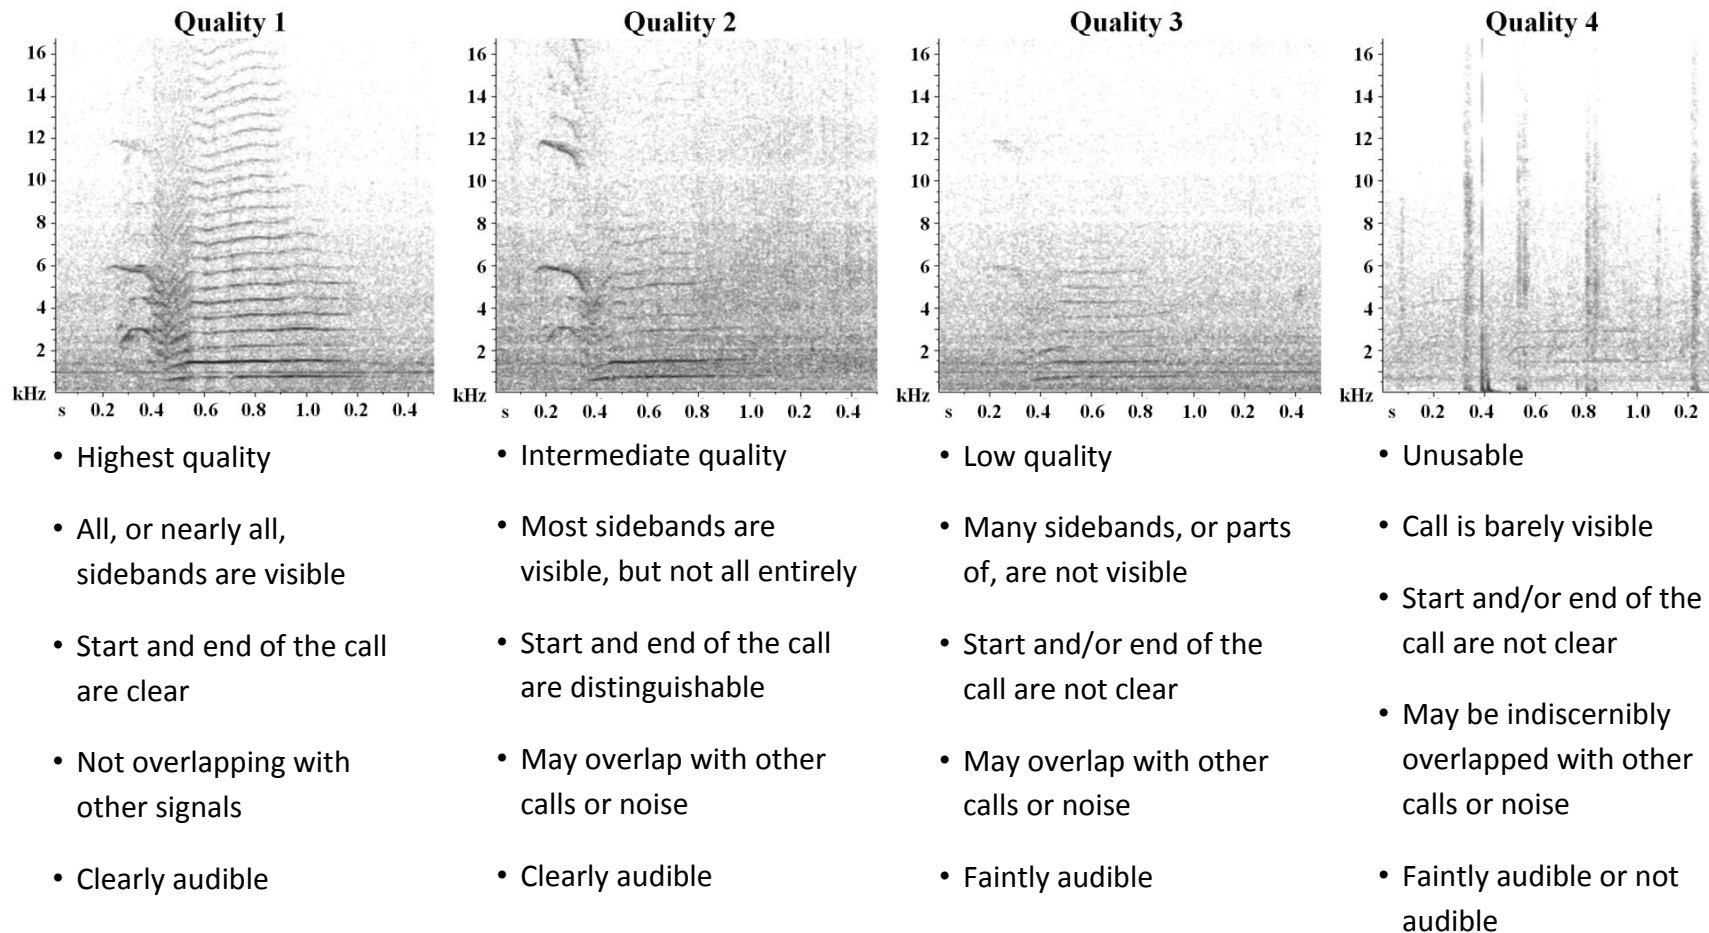

Supplement: Supplementary file 1 [file 1]
