# Supplementary material
Source: publisher figshare collection journal article supplement (https://tandf.figshare.com/articles/dataset/_/5572984)
Supplement: Supplementary file 2 [file 1]

## SUPPLEMENTAL MATERIALS

**Table A. Descriptive Statistics for Western Alaska Call Catalog**

Mean and standard deviation (mean $\pm$ SD) of each measured metric, by call type. The number of calls measured for each type is given as *n*. In cases where statistics were calculated from fewer than *n* measurements, the number of measurements used is given in parentheses.

| Call Type | <i>n</i> | Element Count | Segment Count | UFC Present? | Total Duration (ms) | Time to Max Duration (ms) | Time to Max/Duration |
|-----------|----------|---------------|---------------|--------------|---------------------|---------------------------|----------------------|
| GAB01     | 2        | 1             | 1             | Yes          | 733 $\pm$ 0.0       | 431 $\pm$ 75.0            | 0.5880 $\pm$ 0.1023  |
| GAB02     | 10       | 1             | 1             | No           | 1586 $\pm$ 538.4    | 1494 $\pm$ 507.3          | 0.9466 $\pm$ 0.0940  |
| GAB03     | 6        | 2             | 1             | No           | 1110 $\pm$ 551.4    | 896 $\pm$ 591.8           | 0.7696 $\pm$ 0.1546  |
| GAB04     | 10       | 1             | 1             | Yes          | 674 $\pm$ 62.9      | 599 $\pm$ 48.7            | 0.8897 $\pm$ 0.0537  |
| GAB05     | 10       | 1             | 1             | Yes          | 1331 $\pm$ 504.9    | 1145 $\pm$ 519.4          | 0.8236 $\pm$ 0.1233  |
| GAB06     | 3        | 2             | 2             | Yes          | 1294 $\pm$ 148.2    | 622 $\pm$ 52.3            | 0.4846 $\pm$ 0.0675  |
| GAB07     | 4        | 1             | 1             | No           | 1296 $\pm$ 27.6     | 1295 $\pm$ 27.3           | 1.0000 $\pm$ 0.0000  |
| GAB08     | 6        | 1             | 1             | No           | 1478 $\pm$ 83.6     | 952 $\pm$ 685.0           | 0.6358 $\pm$ 0.4554  |
| GAB09     | 4        | 1             | 1             | No           | 849 $\pm$ 114.7     | 17 $\pm$ 19.6             | 0.0197 $\pm$ 0.0232  |
| GAB10     | 5        | 2             | 1             | No           | 1545 $\pm$ 687.0    | 614 $\pm$ 204.4           | 0.4133 $\pm$ 0.0492  |
| GAB11     | 3        | 1             | 1             | No           | 604 $\pm$ 97.7      | 604 $\pm$ 98.0            | 1.0000 $\pm$ 0.0000  |
| GAB12     | 11       | 2             | 1             | Yes          | 1039 $\pm$ 198.5    | 164 $\pm$ 62.3            | 0.1590 $\pm$ 0.0542  |
| GAB13i    | 10       | 2             | 1             | Yes          | 865 $\pm$ 276.2     | 119 $\pm$ 59.0            | 0.1353 $\pm$ 0.0288  |
| GAB13ii   | 9        | 2             | 1             | Yes          | 573 $\pm$ 52.3      | 80 $\pm$ 20.9             | 0.1396 $\pm$ 0.0280  |
| GAB14     | 6        | 2             | 1             | No           | 533 $\pm$ 41.7      | 274 $\pm$ 29.1            | 0.5133 $\pm$ 0.0368  |
| GAB15     | 2        | 3             | 2             | No           | 1775 $\pm$ 73.5     | 720 $\pm$ 29.0            | 0.4054 $\pm$ 0.0005  |
| GAB16     | 11       | 2             | 1             | No           | 772 $\pm$ 373.8     | 152 $\pm$ 125.1           | 0.2030 $\pm$ 0.0873  |
| GAB17     | 5        | 1             | 1             | No           | 870 $\pm$ 314.6     | 422 $\pm$ 354.1           | 0.5186 $\pm$ 0.4442  |
| GAB18i    | 8        | 2             | 1             | No           | 1295 $\pm$ 164.9    | 85 $\pm$ 29.3             | 0.0656 $\pm$ 0.0181  |
| GAB18ii   | 2        | 1             | 1             | No           | 1253 $\pm$ 72.1     | 48 $\pm$ 3.5              | 0.0379 $\pm$ 0.0006  |
| GAB19     | 9        | 2             | 1             | No           | 986 $\pm$ 112.3     | 382 $\pm$ 124.0           | 0.3828 $\pm$ 0.1105  |
| GAB20     | 10       | 2             | 1             | No           | 1184 $\pm$ 240.6    | 156 $\pm$ 38.5            | 0.1340 $\pm$ 0.0338  |
| GAB21     | 11       | 2             | 1             | No           | 1727 $\pm$ 297.9    | 60 $\pm$ 48.3             | 0.0331 $\pm$ 0.0251  |
| GAB22i    | 4        | 1             | 1             | No           | 770 $\pm$ 163.4     | 755 $\pm$ 153.7           | 0.9831 $\pm$ 0.0338  |
| GAB22ii   | 4        | 1             | 1             | No           | 865 $\pm$ 127.9     | 277 $\pm$ 431.7           | 0.3057 $\pm$ 0.4517  |
| GAB23i    | 4        | 3             | 1             | No           | 2224 $\pm$ 456.1    | 0 $\pm$ 0.0               | 0.0000 $\pm$ 0.0000  |
| GAB23ii   | 6        | 2             | 1             | No           | 1248 $\pm$ 292.4    | 476 $\pm$ 93.2            | 0.3857 $\pm$ 0.0408  |
| GAB24i    | 10       | 1             | 1             | No           | 971 $\pm$ 335.5     | 971 $\pm$ 335.5           | 1.0000 $\pm$ 0.0000  |
| GAB24ii   | 5        | 2             | 1             | No           | 1125 $\pm$ 155.6    | 977 $\pm$ 266.3           | 0.8655 $\pm$ 0.1734  |
| GAB25     | 6        | 3             | 1             | No           | 1372 $\pm$ 143.5    | 1188 $\pm$ 122.9          | 0.8706 $\pm$ 0.0953  |
| GAB26     | 5        | 2             | 1             | No           | 729 $\pm$ 158.3     | 78 $\pm$ 17.4             | 0.1112 $\pm$ 0.0330  |
| GAB27     | 7        | 1             | 1             | No           | 1043 $\pm$ 261.2    | 949 $\pm$ 292.9           | 0.9102 $\pm$ 0.1426  |
| GAB28     | 7        | 1             | 1             | No           | 228 $\pm$ 28.5      | 158 $\pm$ 40.1            | 0.6881 $\pm$ 0.1241  |
| GAB29     | 6        | 2             | 2             | No           | 1327 $\pm$ 134.0    | 572 $\pm$ 130.2           | 0.4285 $\pm$ 0.0643  |
| GAB30     | 4        | 1             | 1             | No           | 1065 $\pm$ 136.0    | 130 $\pm$ 17.1            | 0.1229 $\pm$ 0.0173  |
| GAB31     | 10       | 1             | 1             | No           | 360 $\pm$ 94.4      | 128 $\pm$ 103.4           | 0.3910 $\pm$ 0.3098  |

Table A. (cont.)

| Call Type | <i>n</i> | Initial SBI (Hz) | Final SBI (Hz) | Initial Freq. (Hz) | Center Freq. (Hz)           | Final Freq. (Hz) | Frequency Trend Ratio |
|-----------|----------|------------------|----------------|--------------------|-----------------------------|------------------|-----------------------|
| GAB01     | 2        | 711 ± 48         | 741 ± 91       | 709 ± 53           | 777 ± 6                     | 761 ± 60         | 0.9319 ± 0.0032       |
| GAB02     | 10       | 2800 ± 354       | 5033 ± 911     | 2544 ± 383         | 4182 ± 466                  | 5119 ± 1023      | 0.5033 ± 0.0632       |
| GAB03     | 6        | 378 ± 97         | 5927 ± 76      | 294 ± 76           | 617 ± 78                    | 5896 ± 89        | 0.0499 ± 0.0132       |
| GAB04     | 10       | 698 ± 68         | 1141 ± 79      | 710 ± 67           | 1050 ± 26                   | 1168 ± 91        | 0.6082 ± 0.0314       |
| GAB05     | 10       | 435 ± 61         | 594 ± 22       | 353 ± 101          | 592 ± 24                    | 606 ± 27         | 0.5818 ± 0.1629       |
| GAB06     | 3        | 762 ± 34         | 2056 ± 120     | 905 ± 33           | 2094 ± 139 (2) <sup>a</sup> | 2112 ± 132       | 0.4300 ± 0.0346       |
| GAB07     | 4        | 538 ± 33         | 731 ± 32       | 527 ± 17           | 636 ± 8                     | 694 ± 31 (3)     | 0.6719 ± 0.0507       |
| GAB08     | 6        | 2291 ± 102       | 2292 ± 50      | 2291 ± 101         | 2299 ± 63                   | 2300 ± 66        | 0.9960 ± 0.0201       |
| GAB09     | 4        | 779 ± 30         | 625 ± 51       | 762 ± 19           | 678 ± 17                    | 587 ± 36 (3)     | 1.2858 ± 0.1325       |
| GAB10     | 5        | 471 ± 69         | 477 ± 61       | 407 ± 38           | 542 ± 21                    | 479 ± 61         | 0.8578 ± 0.1134       |
| GAB11     | 3        | 432 ± 110        | 987 ± 209      | 437 ± 130          | 759 ± 88                    | 959 ± 280        | 0.5066 ± 0.2776       |
| GAB12     | 11       | 896 ± 79         | 595 ± 121      | 847 ± 62           | 420 ± 58                    | 601 ± 147        | 1.4813 ± 0.3577       |
| GAB13i    | 10       | 1397 ± 115       | 756 ± 30       | 1222 ± 63          | 714 ± 34                    | 743 ± 28         | 1.6467 ± 0.1121       |
| GAB13ii   | 9        | 1379 ± 108       | 744 ± 59       | 1288 ± 187         | 741 ± 37                    | 761 ± 60         | 1.7118 ± 0.3673       |
| GAB14     | 6        | 558 ± 74         | 565 ± 39       | 528 ± 71           | 619 ± 25                    | 594 ± 29         | 0.8890 ± 0.1151       |
| GAB15     | 2        | 834 ± 4          | 253 ± 9        | 765 ± 35           | 1326 ± 16                   | 253 ± 9          | 3.0253 ± 0.2429       |
| GAB16     | 11       | 1468 ± 284       | 1105 ± 99      | 1319 ± 280         | 1214 ± 348                  | 1103 ± 95        | 1.2146 ± 0.3342       |
| GAB17     | 5        | 469 ± 10         | 459 ± 14       | 462 ± 7            | 466 ± 14                    | 461 ± 13         | 1.0020 ± 0.0429       |
| GAB18i    | 8        | 2741 ± 678 (7)   | 368 ± 9        | 2594 ± 654         | 472 ± 98                    | 368 ± 10         | 7.0651 ± 1.8361       |
| GAB18ii   | 2        | 556 ± 10         | 331 ± 4        | 565 ± 4            | 526 ± 3                     | 348.5 (1)        | 1.6176 (1)            |
| GAB19     | 9        | 2645 ± 346       | 451 ± 42       | 2433 ± 307         | 454 ± 37 (8) <sup>b</sup>   | 455 ± 32         | 5.3885 ± 0.9003       |
| GAB20     | 10       | 2964 ± 557       | 369 ± 28       | 2550 ± 535         | 426 ± 13                    | 354 ± 43         | 7.1784 ± 1.1795       |
| GAB21     | 11       | 3603 ± 224       | 324 ± 29       | 3594 ± 187         | 437 ± 68                    | 323 ± 28         | 11.1619 ± 0.5720      |
| GAB22i    | 4        | 2980 ± 236       | 3314 ± 138     | 2764 ± 274         | 3163 ± 150                  | 3329 ± 145       | 0.8288 ± 0.0478       |
| GAB22ii   | 4        | 3291 ± 167       | 3152 ± 140     | 3208 ± 242         | 3247 ± 139                  | 3201 ± 323       | 1.0104 ± 0.1283       |
| GAB23i    | 4        | 3447 ± 182       | 273 ± 42       | 3565 ± 276         | 2524 ± 123                  | 270 ± 39         | 13.4084 ± 1.9134      |
| GAB23ii   | 6        | 2396 ± 61        | 276 ± 14       | 2388 ± 44          | 317 ± 42                    | 281 ± 19         | 8.5380 ± 0.5720       |
| GAB24i    | 10       | 1135 ± 100       | 1378 ± 80      | 999 ± 75           | 1286 ± 80                   | 1409 ± 110       | 0.7123 ± 0.0726       |
| GAB24ii   | 5        | 1322 ± 39        | 1673 ± 48      | 1244 ± 90          | 1610 ± 92                   | 1674 ± 46        | 0.7443 ± 0.0649       |
| GAB25     | 6        | 1653 ± 186       | 2736 ± 192 (4) | 1567 ± 275         | 256 ± 5 (5)                 | 2774 ± 262       | 0.5665 ± 0.1051       |
| GAB26     | 5        | 2352 ± 127 (4)   | 348 ± 38       | 2329 ± 259         | 356 ± 39                    | 355 ± 31         | 6.5564 ± 0.4928       |
| GAB27     | 7        | 2533 ± 155       | 2961 ± 477     | 2525 ± 156         | 2579 ± 176                  | 2942 ± 461       | 0.8710 ± 0.1006       |
| GAB28     | 7        | 799 ± 121 (6)    | 1135 ± 102 (6) | 651 ± 63           | 1124 ± 90                   | 1158 ± 81 (6)    | 0.5671 ± 0.0831 (6)   |
| GAB29     | 6        | 1193 ± 54        | 899 ± 50       | 1093 ± 112         | 1097 ± 345 (3) <sup>c</sup> | 881 ± 23         | 1.2410 ± 0.1331       |
| GAB30     | 4        | 975 ± 116        | 746 ± 99       | 866 ± 121          | 774 ± 89                    | 793 ± 109        | 1.1045 ± 0.1799       |
| GAB31     | 10       | 1150 ± 80        | 1126 ± 142     | 1156 ± 38 (9)      | 1231 ± 108 (7)              | 1191 ± 171       | 1.0873 ± 0.1492       |

<sup>a</sup> For 1 of 3 calls measured for this type, the centerpoint occurred within the inter-segment interval.

<sup>b</sup> For 1 of 9 calls measured for this type, the center frequency was 3495 Hz, as it occurred during the first, rather than the second, element. This value was not included in the reported mean or SD.

<sup>c</sup> For 3 of 6 calls measured for this type, the centerpoint occurred within the inter-segment interval.

Table A. (cont.)

| Call Type | <i>n</i> | Frequency Range Ratio | Duration 1st Element (ms) | Duration 2nd Element (ms) | Duration 3rd Element (ms) | Inter-Segment Interval (ms) |
|-----------|----------|-----------------------|---------------------------|---------------------------|---------------------------|-----------------------------|
| GAB01     | 2        | $1.1943 \pm 0.0182$   | $611 \pm 9.2$             | —                         | —                         | —                           |
| GAB02     | 10       | $1.9925 \pm 0.2447$   | $1586 \pm 538.4$          | —                         | —                         | —                           |
| GAB03     | 6        | $21.5725 \pm 5.5099$  | $872 \pm 586.4$           | $238 \pm 122.7$           | —                         | —                           |
| GAB04     | 10       | $1.8955 \pm 0.1851$   | $674 \pm 62.9$            | —                         | —                         | —                           |
| GAB05     | 10       | $2.3092 \pm 0.8030$   | $1311 \pm 520.9$          | —                         | —                         | —                           |
| GAB06     | 3        | $5.1233 \pm 0.2728$   | $361 \pm 58.2$            | $691 \pm 157.8$           | —                         | $187 \pm 22.7$              |
| GAB07     | 4        | $1.4982 \pm 0.1160$   | $1042 \pm 62.3$           | —                         | —                         | —                           |
| GAB08     | 6        | $1.0216 \pm 0.0208$   | $1478 \pm 83.6$           | —                         | —                         | —                           |
| GAB09     | 4        | $1.3376 \pm 0.1569$   | $849 \pm 114.9$           | —                         | —                         | —                           |
| GAB10     | 5        | $1.2812 \pm 0.1391$   | $446 \pm 308.7$           | $1098 \pm 379.6$          | —                         | —                           |
| GAB11     | 3        | $2.6251 \pm 1.2081$   | $604 \pm 97.7$            | —                         | —                         | —                           |
| GAB12     | 11       | $2.7019 \pm 0.4049$   | $157 \pm 42.7$            | $779 \pm 163.1$           | —                         | —                           |
| GAB13i    | 10       | $2.7858 \pm 0.3223$   | $124 \pm 22.3$            | $689 \pm 224.5$           | —                         | —                           |
| GAB13ii   | 9        | $2.6973 \pm 0.1375$   | $93 \pm 15.8$             | $439 \pm 49.9$            | —                         | —                           |
| GAB14     | 6        | $1.2554 \pm 0.1616$   | $199 \pm 35.7$            | $334 \pm 16.8$            | —                         | —                           |
| GAB15     | 2        | $5.6988 \pm 0.2754$   | $562 \pm 12.0$            | $463 \pm 15.6$            | $596 \pm 25.5$            | $153 \pm 21.2$              |
| GAB16     | 11       | $1.8732 \pm 0.2091$   | $260 \pm 143.3$           | $511 \pm 313.5$           | —                         | —                           |
| GAB17     | 5        | $1.0509 \pm 0.0146$   | $870 \pm 314.6$           | —                         | —                         | —                           |
| GAB18i    | 8        | $9.7627 \pm 1.1344$   | $83 \pm 16.7$             | $1212 \pm 158.9$          | —                         | —                           |
| GAB18ii   | 2        | $1.6641 \pm 0.0394$   | $1253 \pm 72.1$           | —                         | —                         | —                           |
| GAB19     | 9        | $11.7278 \pm 2.2739$  | $415 \pm 65.8$            | $572 \pm 87.6$            | —                         | —                           |
| GAB20     | 10       | $10.0475 \pm 1.7405$  | $173 \pm 38.0$            | $1011 \pm 219.6$          | —                         | —                           |
| GAB21     | 11       | $11.5694 \pm 0.7318$  | $629 \pm 124.7$           | $1098 \pm 265.7$          | —                         | —                           |
| GAB22i    | 4        | $1.2166 \pm 0.0618$   | $770 \pm 163.4$           | —                         | —                         | —                           |
| GAB22ii   | 4        | $1.1249 \pm 0.0686$   | $865 \pm 127.9$           | —                         | —                         | —                           |
| GAB23i    | 4        | $13.2969 \pm 2.0826$  | $968 \pm 365.1$           | $756 \pm 186.4$           | $500 \pm 250.9$           | —                           |
| GAB23ii   | 6        | $8.7378 \pm 0.5080$   | $483 \pm 97.4$            | $765 \pm 203.5$           | —                         | —                           |
| GAB24i    | 10       | $1.3893 \pm 0.1392$   | $971 \pm 335.5$           | —                         | —                         | —                           |
| GAB24ii   | 5        | $1.3821 \pm 0.1097$   | $469 \pm 155.3$           | $654 \pm 129.5$           | —                         | —                           |
| GAB25     | 6        | $11.2506 \pm 1.1064$  | $527 \pm 91.9$            | $561 \pm 66.5$            | $283 \pm 89.9$            | —                           |
| GAB26     | 5        | $10.7401 \pm 1.6175$  | $85 \pm 19.2$             | $645 \pm 161.4$           | —                         | —                           |
| GAB27     | 7        | $1.1866 \pm 0.1423$   | $1004 \pm 24.7$           | —                         | —                         | —                           |
| GAB28     | 7        | $1.9923 \pm 0.3658$   | $1018 \pm 19.3$           | —                         | —                         | —                           |
| GAB29     | 6        | $1.5234 \pm 0.0805$   | $574 \pm 129.3$           | $632 \pm 84.7$            | —                         | $121 \pm 14.5$              |
| GAB30     | 4        | $1.3682 \pm 0.1044$   | $1065 \pm 136.0$          | —                         | —                         | —                           |
| GAB31     | 10       | $1.2423 \pm 0.1063$   | $1019 \pm 39.2$           | —                         | —                         | —                           |

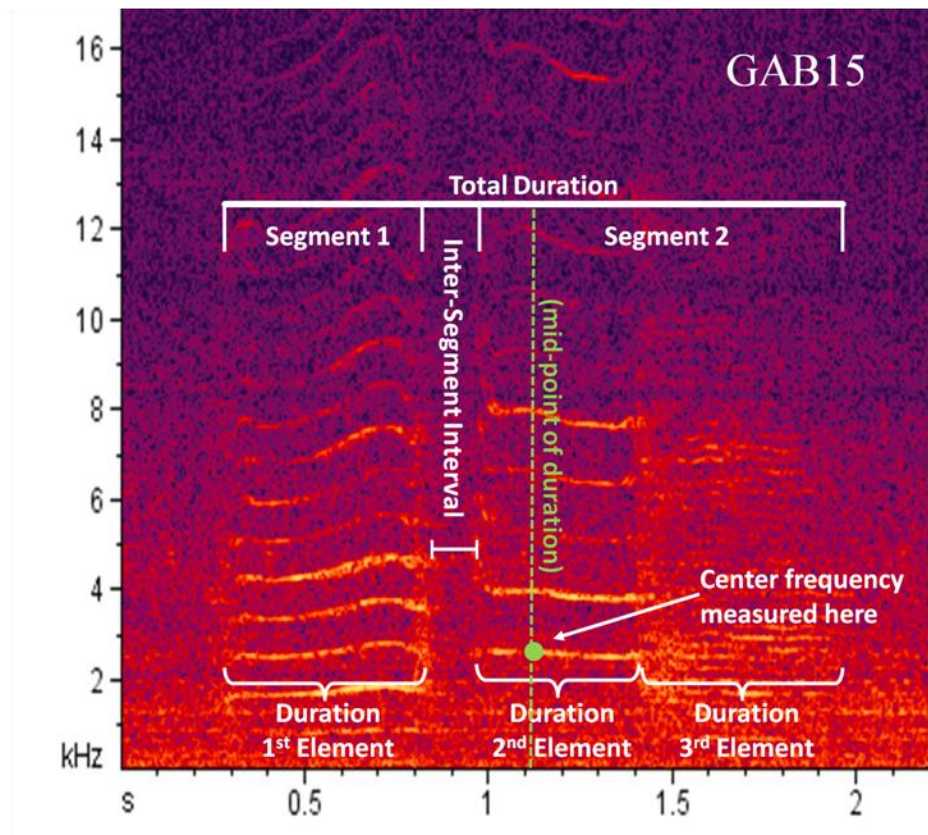

**Figure A.** Illustration of additional measurements collected for descriptive statistics. Center frequency values were obtained by measuring the fundamental frequency contour (lowest band) at the midpoint of the call's duration. However, in this example, the lowest band was not visible at the mid-point of the call, so the center frequency was measured on the second band (at the green circle) and the resulting value was divided by two. (48 kHz, FFT size = 512 points, Hanning window, 50% overlap)
