# Supplementary material
Source: publisher figshare collection journal article supplement (https://tandf.figshare.com/articles/dataset/_/5572984)
Supplement: Supplementary file 3 [file 1]

# SUPPLEMENTAL MATERIALS

**Table B. Summary of Classified Calls, by Call Type and Encounter**

| Call<br>Type | Encounter (by sighting #) |             |             |                  |              |             |                                    |              |              |              | No. of<br>Calls |
|--------------|---------------------------|-------------|-------------|------------------|--------------|-------------|------------------------------------|--------------|--------------|--------------|-----------------|
|              | Western Aleutian Islands  |             |             | Pribilof Islands |              |             | Eastern & Central Aleutian Islands |              |              |              |                 |
|              | 06OL-<br>155              | 10AE-<br>66 | 10AE-<br>68 | 05AE-<br>773     | 07OL-<br>257 | 09AQ-<br>49 | 02CP-<br>164                       | 05AE-<br>236 | 05AE-<br>239 | 06OL-<br>553 |                 |
| GAB01        | —                         | —           | 2           | —                | —            | 5           | 2                                  | —            | —            | —            | 9               |
| GAB02        | 1                         | —           | 1           | —                | —            | —           | —                                  | 2            | 11           | —            | 15              |
| GAB03        | —                         | —           | 17          | —                | —            | —           | —                                  | —            | —            | —            | 17              |
| GAB04        | —                         | —           | 37          | —                | —            | —           | —                                  | —            | —            | —            | 37              |
| GAB05        | —                         | 1           | 49          | —                | —            | —           | —                                  | —            | —            | —            | 50              |
| GAB06        | —                         | —           | 14          | —                | —            | —           | —                                  | —            | —            | —            | 14              |
| GAB07        | —                         | —           | 12          | —                | —            | —           | —                                  | —            | —            | —            | 12              |
| GAB08        | —                         | —           | 8           | —                | —            | —           | —                                  | —            | —            | —            | 8               |
| GAB09        | —                         | —           | 13          | —                | —            | 1           | —                                  | —            | —            | —            | 14              |
| GAB10        | —                         | —           | 2           | —                | 6            | —           | —                                  | —            | —            | —            | 8               |
| GAB11        | —                         | —           | —           | —                | 4            | —           | —                                  | —            | —            | —            | 4               |
| GAB12        | —                         | —           | —           | —                | 17           | —           | —                                  | —            | —            | —            | 17              |
| GAB13i       | —                         | —           | —           | —                | —            | 40          | —                                  | —            | —            | —            | 40              |
| GAB13ii      | —                         | —           | —           | —                | —            | 10          | —                                  | —            | —            | —            | 10              |
| GAB14        | —                         | —           | —           | —                | —            | 13          | —                                  | —            | —            | —            | 13              |
| GAB15        | —                         | —           | —           | 3                | 2            | 3           | —                                  | —            | —            | —            | 8               |
| GAB16        | —                         | —           | —           | —                | —            | 4           | —                                  | —            | 22           | —            | 26              |
| GAB17        | —                         | —           | —           | 1                | —            | —           | —                                  | 6            | 4            | —            | 11              |
| GAB18i       | —                         | —           | —           | —                | —            | —           | —                                  | 44           | 1            | —            | 45              |
| GAB18ii      | —                         | —           | —           | —                | —            | —           | —                                  | —            | 10           | —            | 10              |
| GAB19        | —                         | —           | —           | —                | —            | —           | —                                  | —            | 49           | —            | 49              |
| GAB20        | —                         | —           | —           | —                | —            | —           | —                                  | 49           | 1            | —            | 50              |
| GAB21        | —                         | —           | —           | —                | —            | —           | —                                  | —            | 61           | —            | 61              |
| GAB22i       | —                         | —           | —           | —                | —            | —           | —                                  | 3            | 3            | —            | 6               |
| GAB22ii      | —                         | —           | —           | —                | —            | —           | —                                  | 1            | 8            | —            | 9               |
| GAB23i       | —                         | —           | —           | —                | —            | —           | —                                  | 12           | —            | —            | 12              |
| GAB23ii      | —                         | —           | —           | —                | —            | —           | —                                  | 7            | —            | —            | 7               |
| GAB24i       | —                         | —           | —           | —                | —            | —           | —                                  | 13           | 13           | —            | 26              |
| GAB24ii      | —                         | —           | —           | —                | —            | —           | —                                  | —            | 11           | —            | 11              |
| GAB25        | —                         | —           | —           | —                | —            | —           | —                                  | —            | 16           | —            | 16              |
| GAB26        | —                         | —           | —           | —                | —            | —           | —                                  | 8            | 3            | —            | 11              |
| GAB27        | —                         | —           | —           | —                | —            | —           | —                                  | —            | 9            | —            | 9               |
| GAB28        | —                         | —           | —           | —                | —            | —           | —                                  | 13           | —            | —            | 13              |
| GAB29        | —                         | —           | —           | —                | —            | —           | —                                  | 21           | 1            | —            | 22              |
| GAB30        | —                         | —           | —           | —                | —            | —           | —                                  | 6            | —            | —            | 6               |
| GAB31        | —                         | —           | —           | —                | —            | —           | —                                  | —            | —            | 32           | 32              |
| Total        | 1                         | 1           | 155         | 4                | 29           | 76          | 2                                  | 185          | 223          | 32           | 708             |
